# Supplementary material for: A Rationally Designed Reversible ‘Turn-Off’ Sensor for Glutathione
Source: MDPI journal article supplement (doi:10.3390/bios7030036), 2017-09-06
Supplement: s1 [file s1]

## **A Rationally Designed Reversible ‘Turn-Off’ Sensor for Glutathione**

Sabrina Heng<sup>\*1</sup>, Xiaozhou Zhang<sup>\*1</sup>, Jinxin Pei<sup>2</sup>, Andrew D. Abell<sup>1</sup>

<sup>\*</sup>equal first authors

<sup>1</sup> ARC Centre of Excellence for Nanoscale BioPhotonics, Institute of Photonics and Advanced Sensing, Department of Chemistry, School of Physical Sciences, The University of Adelaide, South Australia, 5005.

<sup>2</sup> Discipline of Physiology, Faculty of Health Sciences, The University of Adelaide, South Australia, 5005.

E-mail: sabrina.heng@adelaide.edu.au, andrew.abell@adelaide.edu.au

## NMR Spectra

<sup>1</sup>H NMR for compound **4a**.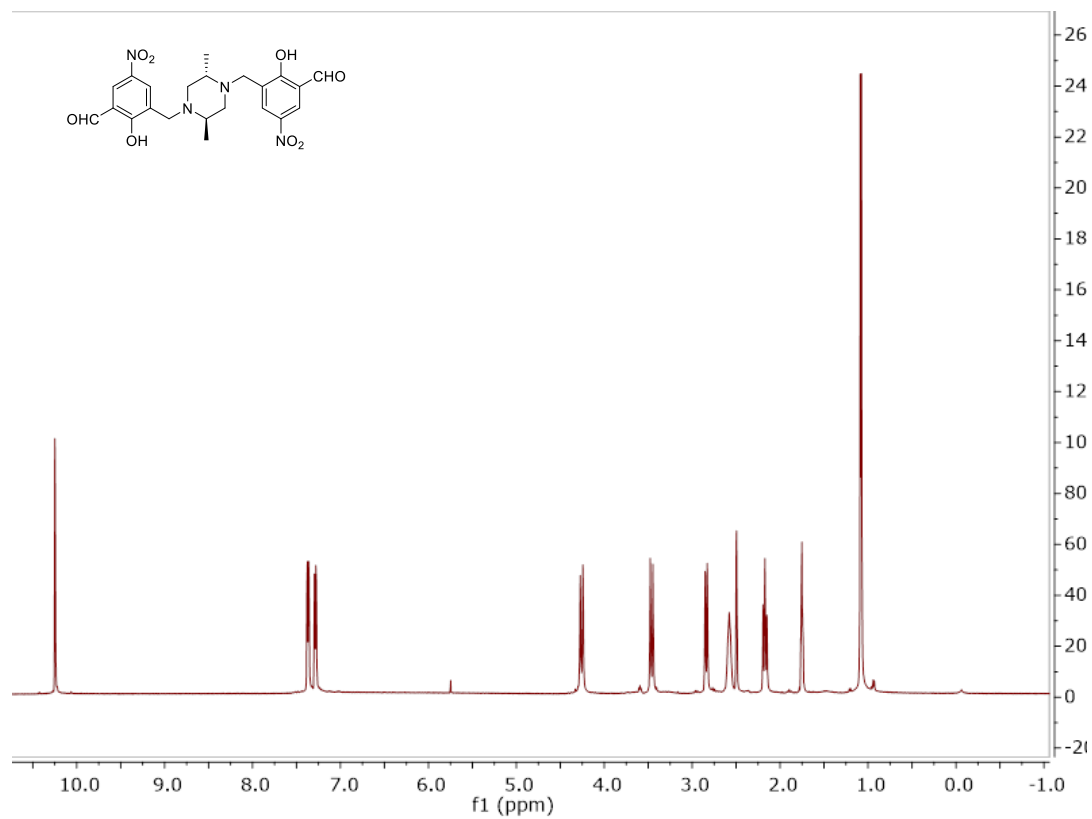<sup>13</sup>C NMR for compound **4a**.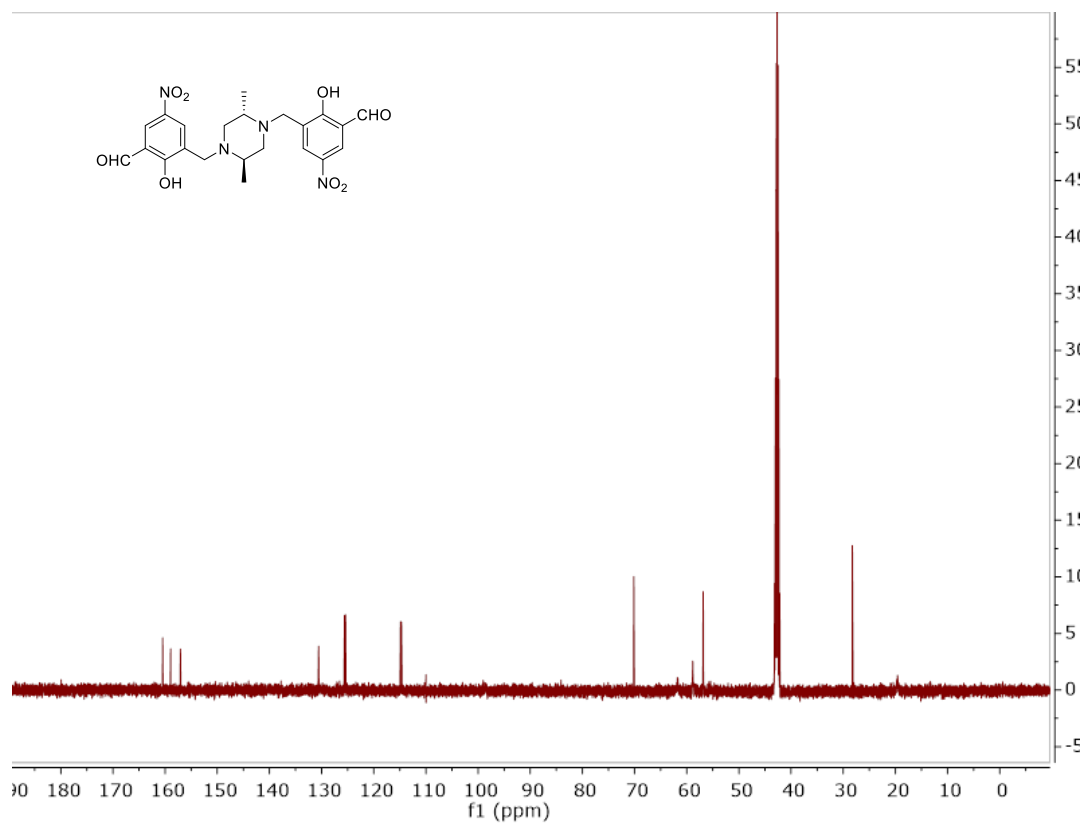

# Electronic Supplementary Information

<sup>1</sup>H NMR of compound **4b**.

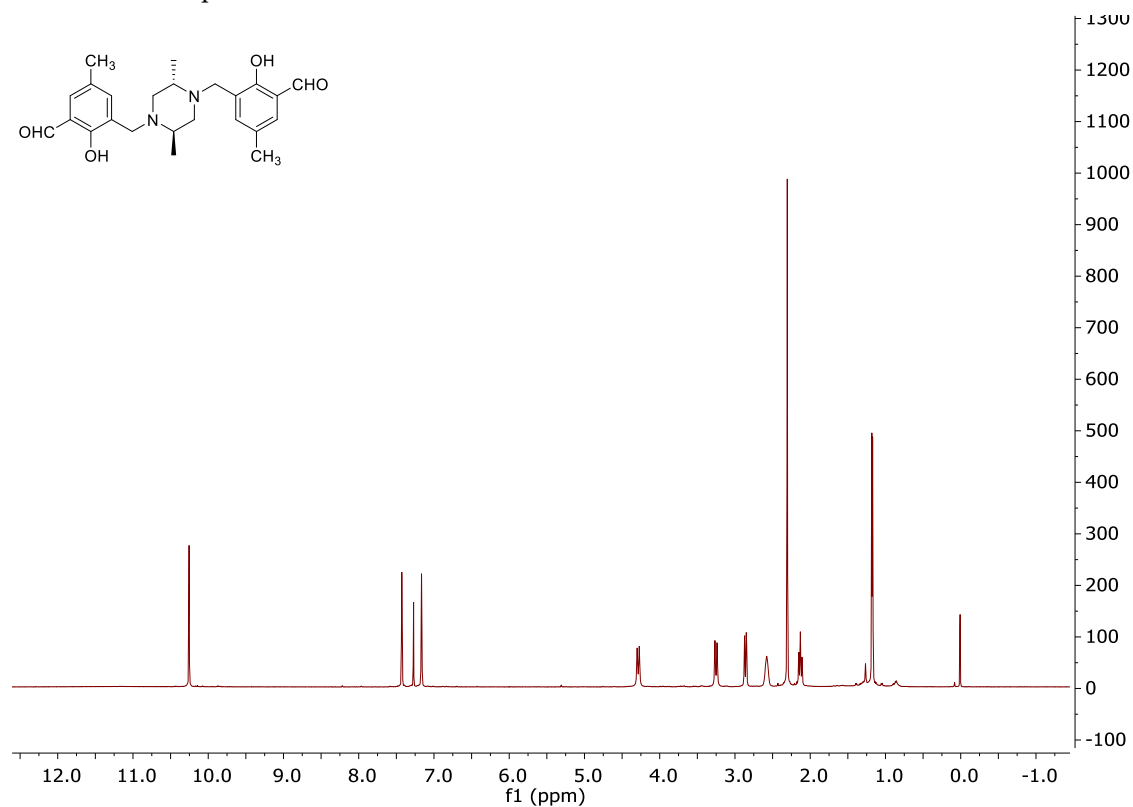

<sup>13</sup>C NMR of compound **4b**.

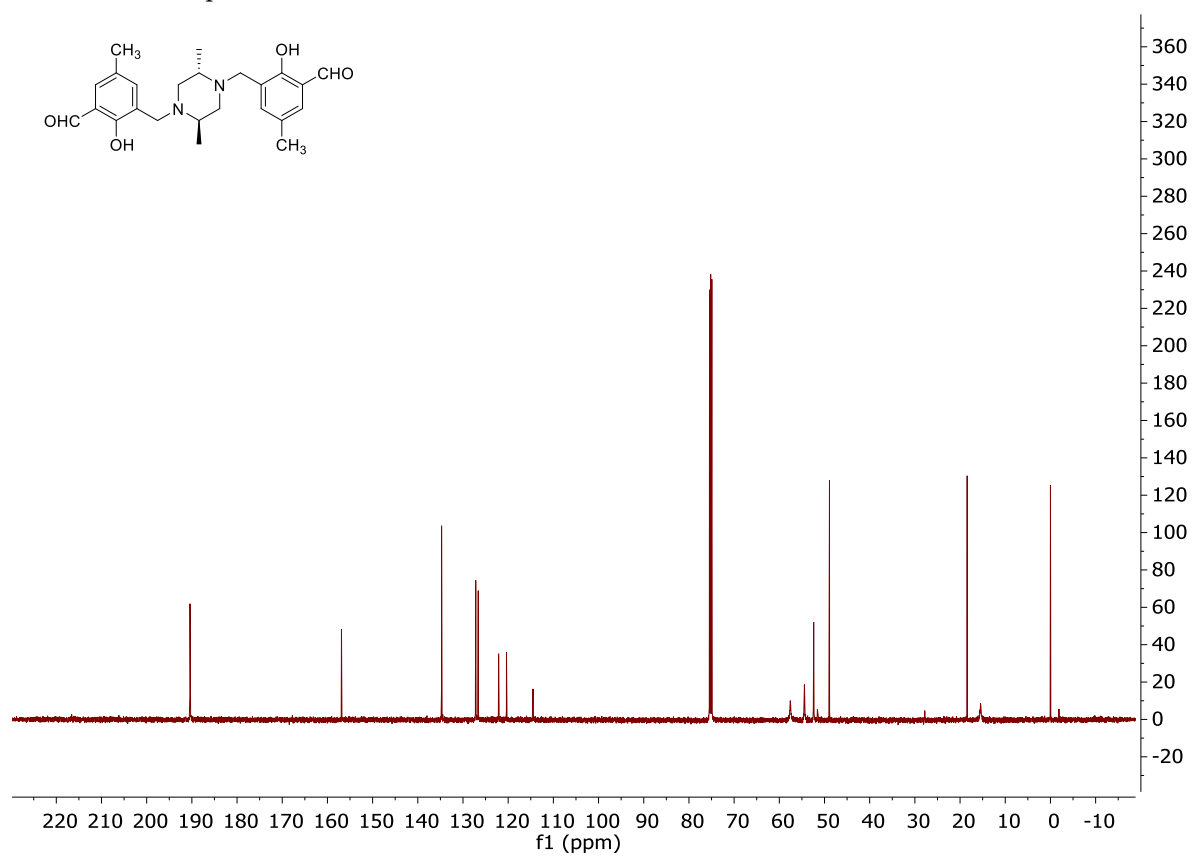

# Electronic Supplementary Information

<sup>1</sup>H NMR for compound 1.

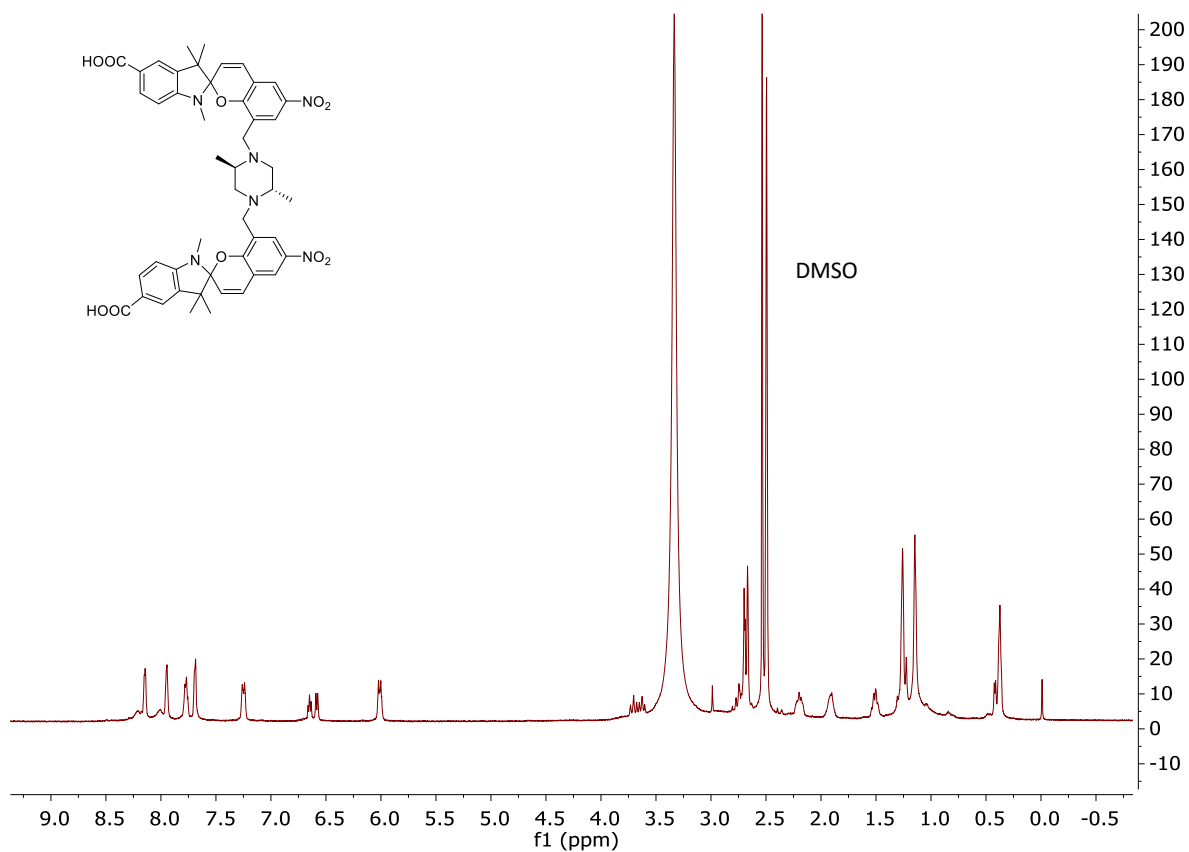

<sup>13</sup>C NMR for compound 1.

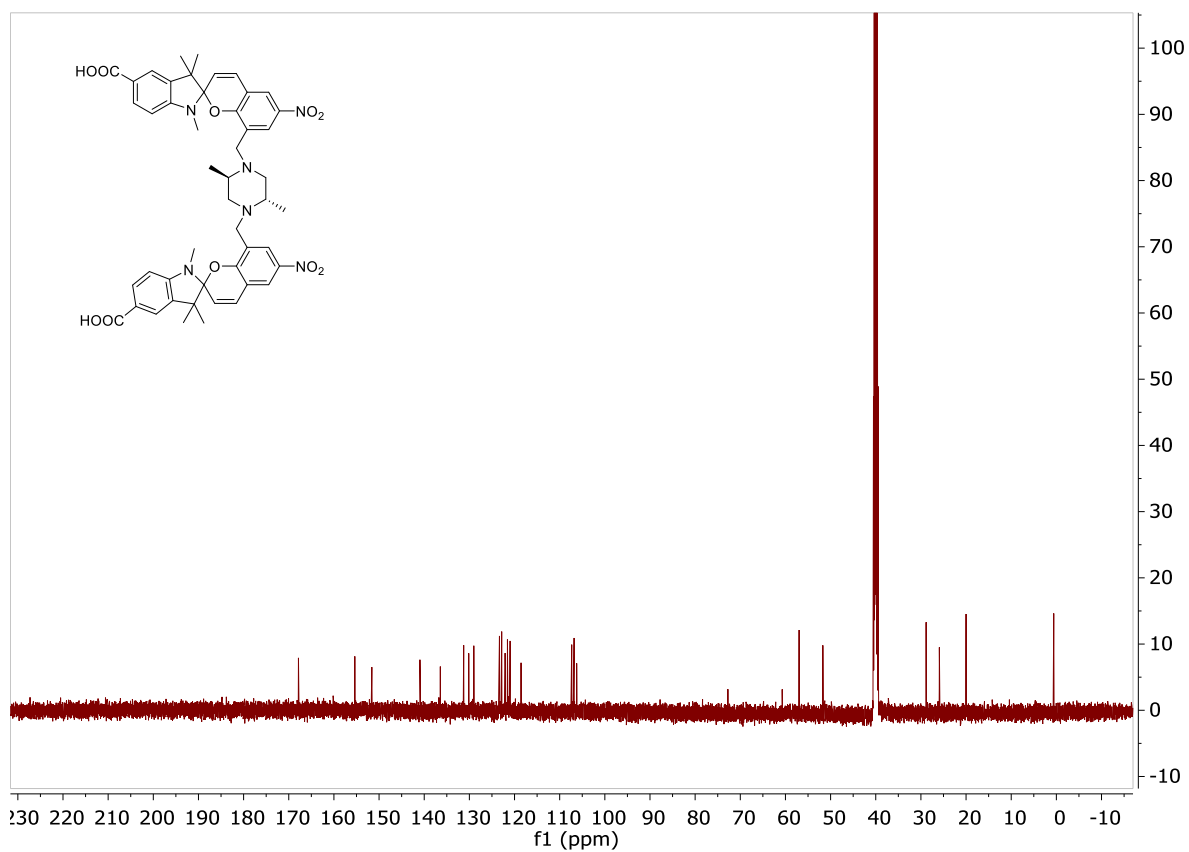

<sup>1</sup>H NMR of compound 6.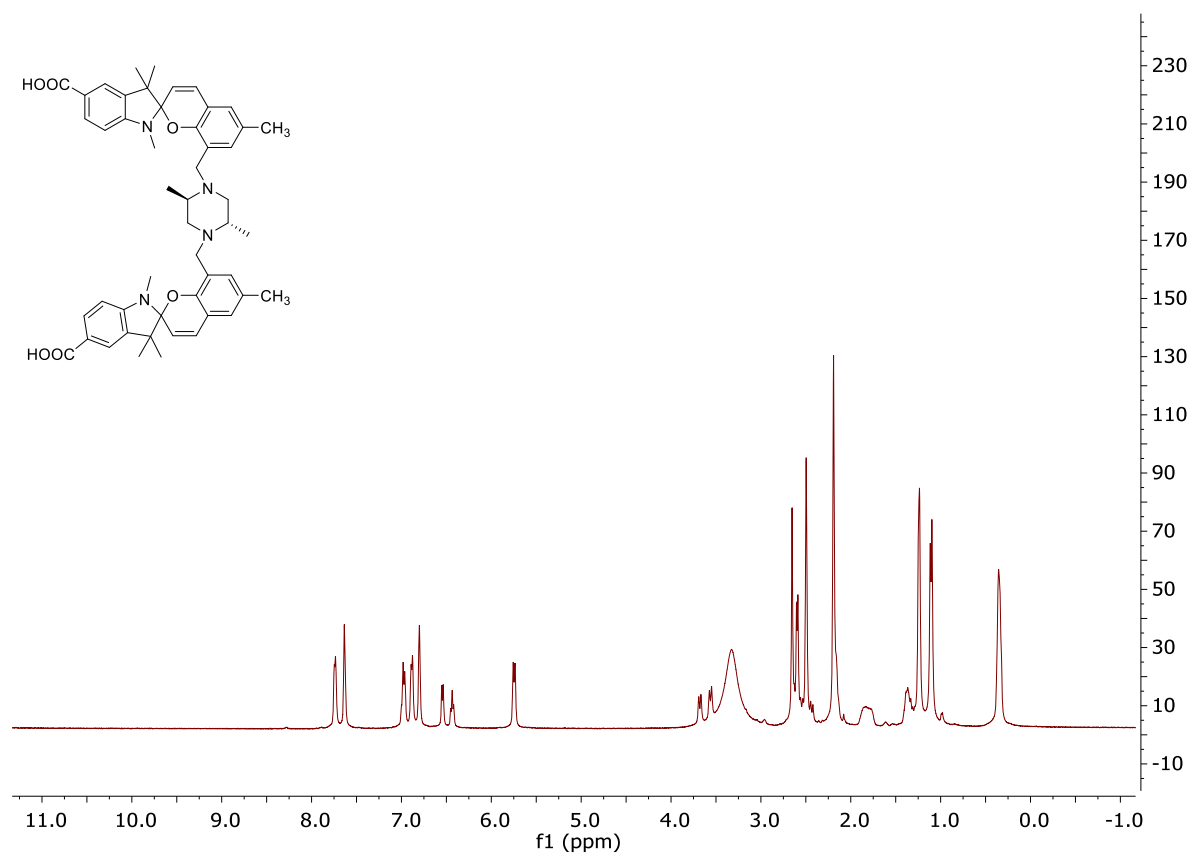<sup>13</sup>C NMR of compound 6.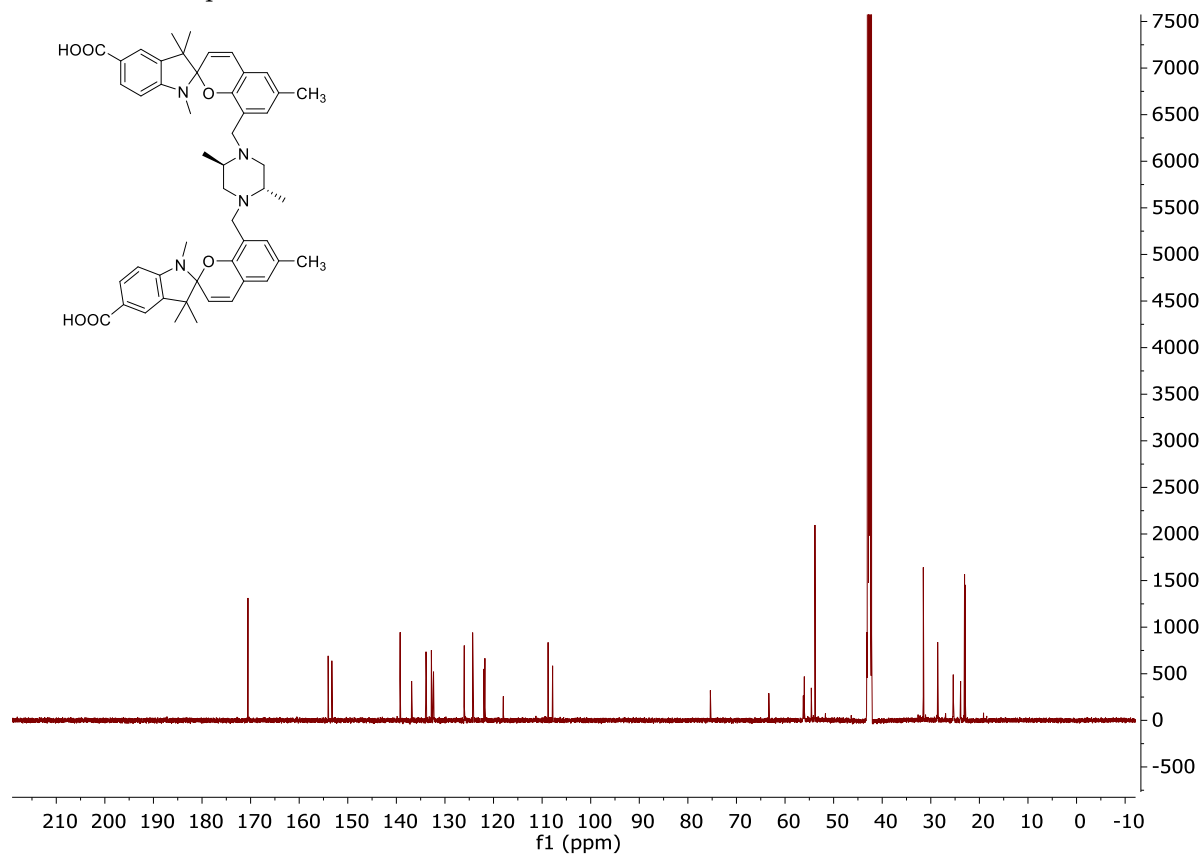

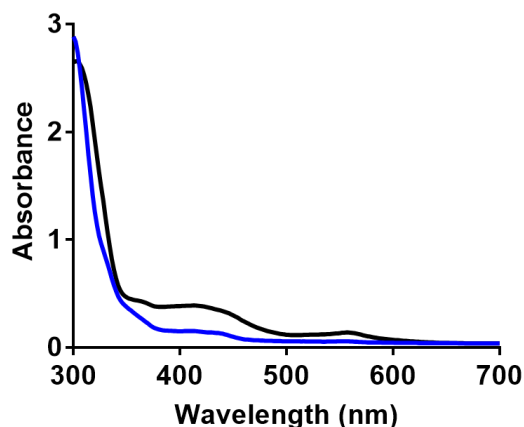

**Figure. S1.** Absorbance of sensor 6 (1 mM) in 2% DMSO in water (black) and acetonitrile (blue).

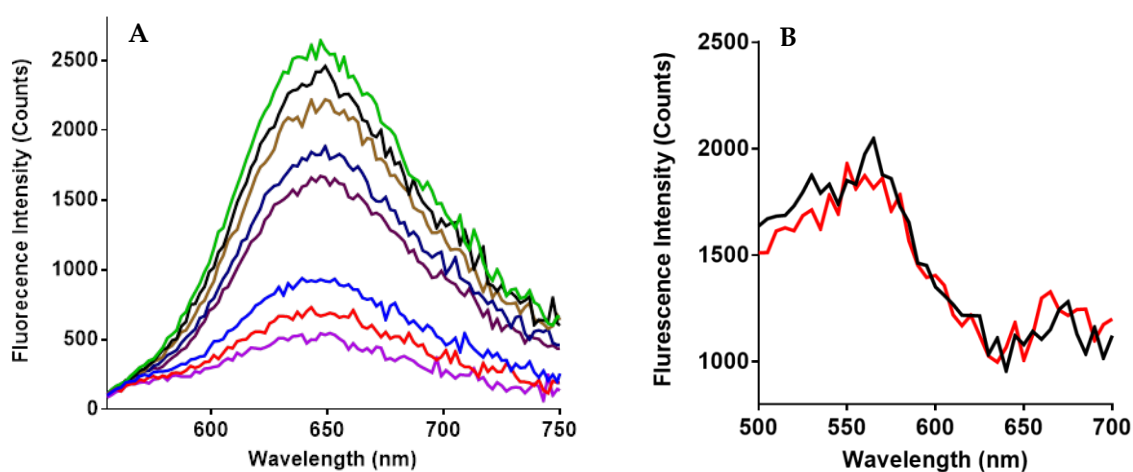

**Figure. S2.** A. Fluorescence spectra of sensor 1 (final concentration = 50  $\mu$ M) obtained after 30 min incubation with 0 —; 78  $\mu$ M —; 156  $\mu$ M —; 313  $\mu$ M —; 625  $\mu$ M —; 1.25 mM —; 2.5 mM —; and 5 mM — GSH in 0.1 % DMSO in water.  $\lambda_{\text{ex}}$  = 532 nm. B. Fluorescence spectra of 6 (final concentration = 50  $\mu$ M) obtained after 30 min incubation with 0 — and 5 mM — GSH.

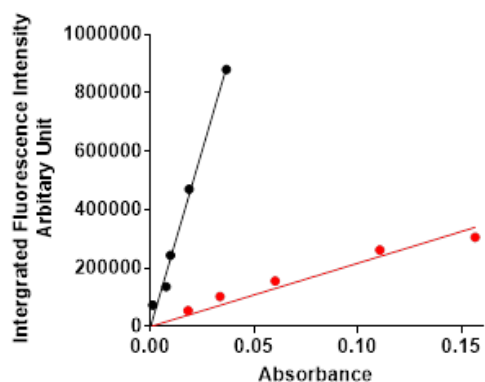

**Figure. S3.** Linear plots for rhodamine B (black) and sensor 1 (red) respectively. The gradient for each sample is proportional to that sample's fluorescence quantum yield.

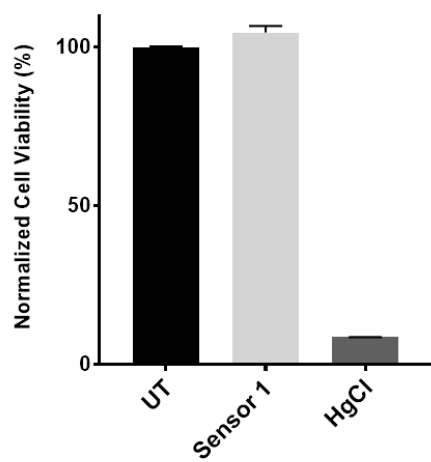

**Figure. S4.** Viability of untreated HEK293T cells (black), cells incubated with sensor 1 (light grey) for 21 h at 37 °C and cells incubated with HgCl for 21 h at 37 °C (dark grey).
